# Supplementary material
Source: publisher site journal article supplement (https://www.spandidos-publications.com/6939/downloadSupplementary)

Figure S1. High-resolution confocal imaging depicting individual and merged channels of the nuclear marker DAPI (blue), MAP-2 (green; mature neuron marker) and GFAP (green; astrocyte marker).

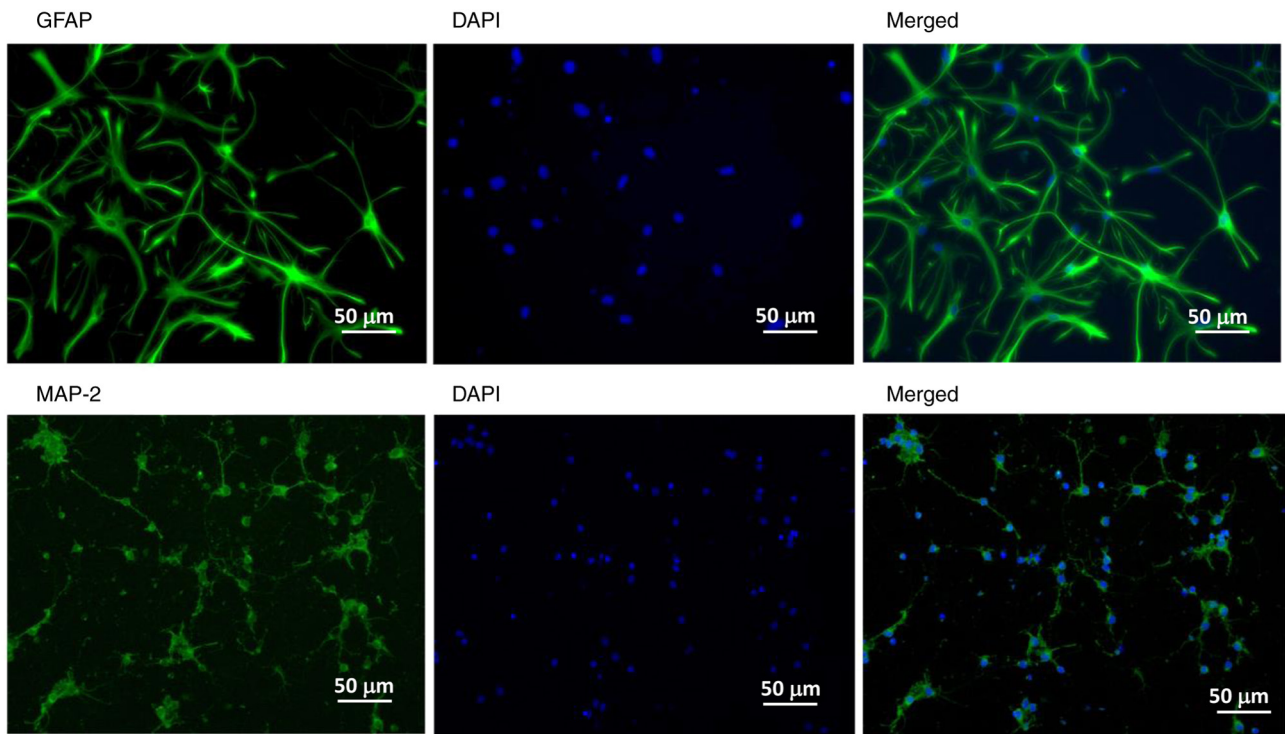

Figure S2. Differential analysis of IL-6, IL-1 $\beta$  and TNF- $\alpha$  in epilepsy and non-epilepsy. (A) The volcano plot shows the differential expression levels of IL-6, IL-1 $\beta$  and TNF- $\alpha$  in the GSE32534 dataset (human source; epilepsy, n=5; normal, n=5). (B) The volcano plot shows the differential expression levels of IL-6, IL-1 $\beta$  and TNF- $\alpha$  in the GSE157689 dataset (mouse source; epilepsy, n=5; normal n=4). Note: Difference threshold: Log FC>|0.5|, adj. P<0.05.

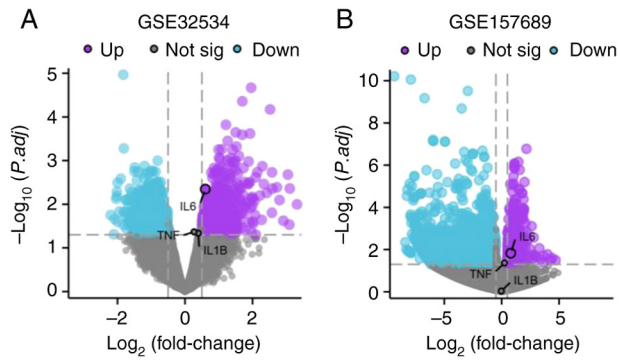

Supplement: Supplementary file 1 [file downloadSupplementary]
